# Supplementary material
Source: PubMed Central journal article supplement (PMC4551411)
Supplement: NIHMS694199-supplement-Supp_FigureS1-S.pdf [file NIHMS694199-supplement-Supp_FigureS1-S.pdf]

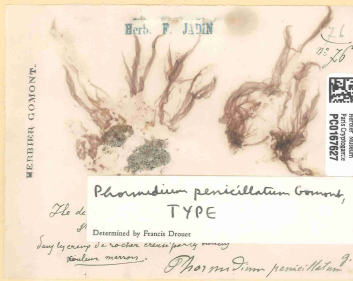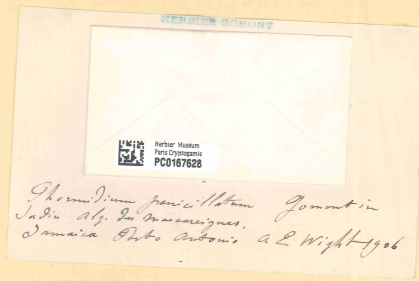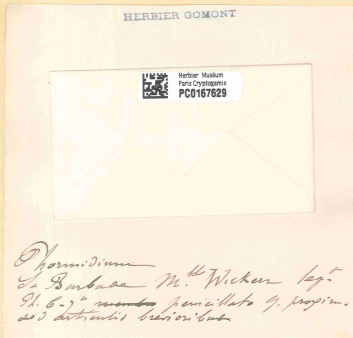

*Phormidium penicillatum* G.

Lyngbyées - Oscillarioidées

Quant à ce qui regarde le substrat ou le milieu cellulaire, nous pourrions être très affirmatif. C'est marin, exclusivement marin, à côté de lui, autour de coraux au contact, dans les rochers

de sable fins, se trouvent en abondance *Coelocybe* *blanckii*, et *C. (foltata?)*, mais ceux de la *S. Gallina*, à quelques mètres des récifs madréporiques qui ne me semblent pas avoir le même milieu, ne le supportent pas. Le *Phormidium* ne croît pas sur les récifs, c'est-à-dire sur les lamelles sont toujours très fortes; mais dans les bassins intérieurs, sortes de lagunes au milieu sont toujours faibles, cependant le réseau peut être très fort pour provoquer la forme *penicillata*, mais j'ajoute qu'il n'est pas seulement dans les trous. Je trouve aussi dans les bassins, cependant partant on peut admettre que les lamelles provoquent un certain mouvement de va et vient.

Habit en touffe épaisse et dans couleur marron foncée alors qu'il est vivant.

Veuillez les renseignements que je puis vous fournir; je complète en disant qu'il a été cueilli le 14 Mars 1890, à St Gilles, Fl. de la Réunion, dans l'Océan Pacifique. Il ne lui est jamais venu l'occasion de l'entretenir.

Je profite de l'occasion pour vous envoyer le *Pro* *Pro* que vous m'avez fait faire dans le dernier envoi, gardé la moitié de l'envoi; renvoyez-moi l'autre moitié.

AIS. 01-02

HERB. CRYPT. MUS. PARIS

PHORMIDIUM PENICILLATUM Gomont

Figure S1. Type specimen of *Phormidium penicillatum* (PC0167627).

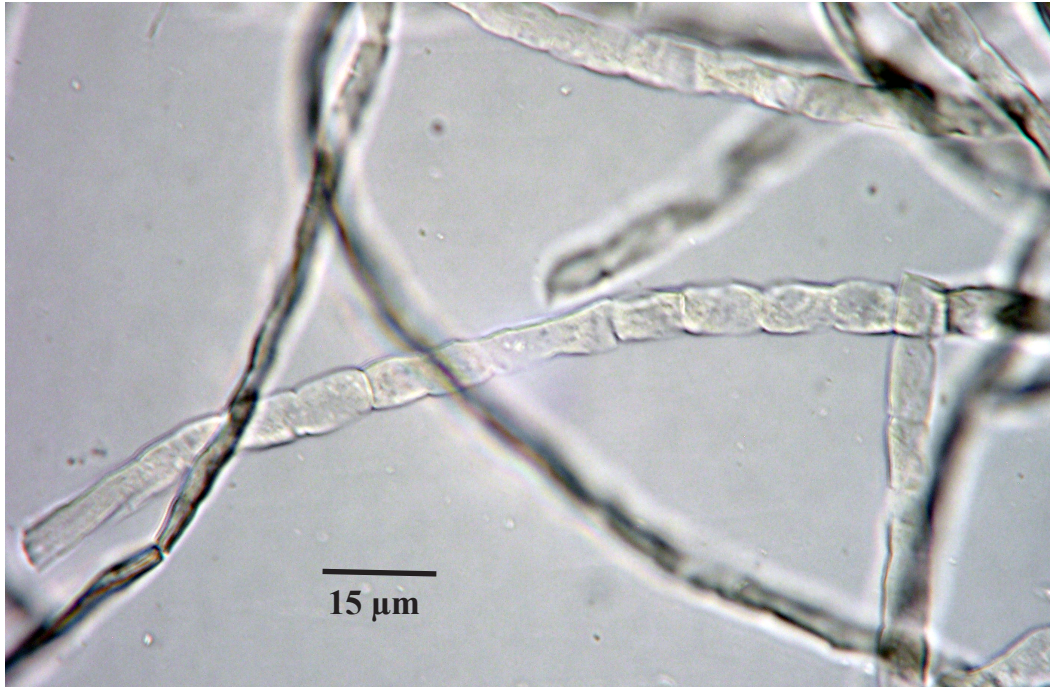

Figure S2. Light microscope image of the type specimen of *Phormidium penicillatum* (PC0167627).  
Scale bar = 15 μm
