# Supplementary material
Source: PubMed Central journal article supplement (PMC4551411)
Supplement: NIHMS694199-supplement-Supp_TableS1-S2.pdf [file NIHMS694199-supplement-Supp_TableS1-S2.pdf]

Table S1. Collection data for *Caldora penicillata* specimens used in this study.

| Sample ID | Location                     | GPS coordinates |             | Depth (m) | Date <sup>a</sup> |
|-----------|------------------------------|-----------------|-------------|-----------|-------------------|
| BCBC11-25 | Raph's wall, Belize          | 16°46'775"N     | 88°04'513"W | 12-15     | 09/17/2011        |
| BCBC11-38 | South Water, Belize          | 16°48'164"N     | 88°04'916"W | 5         | 09/19/2011        |
| BCBC12-2  | Carrie Bow Cay, Belize       | 16°80'360"N     | 88°08'188"W | 1-2       | 08/24/2012        |
| NAB11-8   | Lac Bay, Bonaire             | 12°09'463"N     | 68°23'325"W | 1-2       | 10/19/2011        |
| NAB11-21  | Playa Franz, Bonaire         | 12°09'127"N     | 68°23'282"W | 5-8       | 10/20/2011        |
| NAB11-28  | Lac Bay, Bonaire             | 12°08'968"N     | 68°23'119"W | 1-5       | 10/22/2011        |
| NAB11-29  | Lac Bay, Bonaire             | 12°08'968"N     | 68°23'119"W | 1-5       | 10/22/2011        |
| NAB11-32  | Cali reef, Bonaire           | 12°10'210"N     | 68°22'132"W | 16        | 10/22/2011        |
| NAC11-67  | Porto Marie, Curaçao         | 12°21'814"N     | 69°08'640"W | 1-2       | 10/27/2011        |
| NAC11-68  | Porto Marie, Curaçao         | 12°21'814"N     | 69°08'640"W | 1-2       | 10/27/2011        |
| FK12-2    | Wonderland, Florida Keys     | 24°33'628"N     | 08°30'084"W | 5-8       | 05/18/2012        |
| FK12-18   | Big Pine Ledge, Florida Keys | 24°33'479"N     | 81°22'744"W | 5-8       | 05/21/2012        |
| FK12-20   | Wonderland, Florida Keys     | 24°33'628"N     | 81°30'084"W | 10-12     | 05/21/2012        |
| FK12-26   | Looe Key, Florida Keys       | 24°35'400"N     | 81°31'100"W | 8-10      | 08/13/2012        |
| FK13-1    | Looe Key, Florida Keys       | 24°35'400"N     | 81°31'100"W | 8-10      | 06/10/2013        |
| HMC13-6   | Beceros, Honduras            | 15°91'113"N     | 83°25'733"W | 6-7       | 05/07/2013        |
| HMC13-9   | Caratasca, Honduras          | 16°02'433"N     | 83°31'633"W | 3-5       | 05/07/2013        |

<sup>a</sup>Dates indicated by month/day/year

Table S2. Morphological characterization of *Caldora penicillata* specimens used in this study.

| Sample ID | Thallus   | Color      | Filament width<br>( $\mu\text{m}$ ) <sup>a</sup> | Cell width<br>( $\mu\text{m}$ ) <sup>a</sup> | Cell length<br>( $\mu\text{m}$ ) <sup>a</sup> | Cross-wall constriction | End cells |
|-----------|-----------|------------|--------------------------------------------------|----------------------------------------------|-----------------------------------------------|-------------------------|-----------|
| BCBC11-25 | Puffballs | Orange-red | $6.0 \pm 0.1$                                    | $5.4 \pm 0.1$                                | $6.3 \pm 0.7$                                 | Slight                  | Rounded   |
| BCBC11-38 | Feathery  | Red        | $5.4 \pm 0.3$                                    | $5.3 \pm 0.3$                                | $6.4 \pm 0.7$                                 | Slight                  | Rounded   |
| BCBC12-2  | Feathery  | Red        | $4.9 \pm 0.3$                                    | $4.9 \pm 0.3$                                | $5.7 \pm 0.6$                                 | Slight                  | Rounded   |
| NAB11-8   | Feathery  | Green      | $5.1 \pm 0.2$                                    | $5.0 \pm 0.3$                                | $4.8 \pm 0.6$                                 | Slight                  | Rounded   |
| NAB11-21  | Feathery  | Red        | $4.9 \pm 0.5$                                    | $4.9 \pm 0.5$                                | $6.0 \pm 0.6$                                 | Slight                  | Rounded   |
| NAB11-28  | Puffballs | Green      | $4.7 \pm 0.4$                                    | $4.6 \pm 0.4$                                | $5.8 \pm 0.4$                                 | Slight                  | Rounded   |
| NAB11-29  | Feathery  | Green      | $4.7 \pm 0.4$                                    | $4.7 \pm 0.3$                                | $5.3 \pm 0.4$                                 | Slight                  | Rounded   |
| NAB11-32  | Puffballs | Red        | $4.9 \pm 0.4$                                    | $4.9 \pm 0.4$                                | $6.1 \pm 0.6$                                 | Slight                  | Rounded   |
| NAC11-67  | Puffballs | Green      | $5.4 \pm 0.4$                                    | $5.3 \pm 0.4$                                | $5.7 \pm 0.5$                                 | Slight                  | Rounded   |
| NAC11-68  | Puffballs | Orange-red | $4.5 \pm 0.2$                                    | $4.4 \pm 0.1$                                | $5.3 \pm 0.5$                                 | Slight                  | Rounded   |
| FK12-2    | Feathery  | Red        | $5.7 \pm 0.3$                                    | $5.5 \pm 0.3$                                | $7.1 \pm 1.2$                                 | Slight                  | Rounded   |
| FK12-18   | Feathery  | Red        | $5.1 \pm 0.2$                                    | $5.0 \pm 0.3$                                | $5.7 \pm 0.3$                                 | Slight                  | Rounded   |
| FK12-20   | Feathery  | Red        | $5.3 \pm 0.7$                                    | $5.3 \pm 0.7$                                | $5.9 \pm 0.3$                                 | Slight                  | Rounded   |
| FK12-26   | Feathery  | Red        | $5.1 \pm 0.5$                                    | $4.9 \pm 0.6$                                | $6.3 \pm 0.6$                                 | Slight                  | Rounded   |
| FK13-1    | Feathery  | Red        | $5.3 \pm 0.6$                                    | $5.2 \pm 0.7$                                | $6.6 \pm 0.5$                                 | Slight                  | Rounded   |
| HMC13-6   | Feathery  | Red        | $4.4 \pm 0.1$                                    | $4.3 \pm 0.1$                                | $5.5 \pm 0.1$                                 | Slight                  | Rounded   |
| HMC13-9   | Feathery  | Orange-red | $5.4 \pm 0.5$                                    | $5.2 \pm 0.7$                                | $6.6 \pm 0.6$                                 | Slight                  | Rounded   |

<sup>a</sup>The size measurements presented in this table are mean  $\pm$  SD in  $\mu\text{m}$  (n = 10).
